# Supplementary material for: Hygroscopicity of Fresh and Aged Salt Mixtures from Saline Lakes
Source: MDPI journal article supplement (doi:10.3390/atmos12091203), 2021-09-16
Supplement: s1 [file s1]

# Supporting Information

*for*

## **Hygroscopicity of Fresh and Aged Salt Mixtures from Saline Lakes**

Jun Li<sup>1</sup>, Wanyu Liu<sup>1</sup>, Linjie Li<sup>2</sup>, Wenjun Gu<sup>3,4</sup>, Xiyang Zhang<sup>5</sup>, Mattias Hallquist<sup>2</sup>, Mingjin Tang<sup>3,4</sup>, Sen Wang<sup>1\*</sup> and Xiangrui Kong<sup>2\*</sup>

<sup>1</sup> *Department of Environmental Sciences, College of Urban and Environmental Sciences, Northwest University, Xi'an, China*

<sup>2</sup> *Department of Chemistry and Molecular Biology, Atmospheric Science, University of Gothenburg, SE-412 96 Gothenburg, Sweden*

<sup>3</sup> *State Key Laboratory of Organic Geochemistry, Guangzhou Institute of Geochemistry, Chinese Academy of Sciences, Guangzhou, China*

<sup>4</sup> *University of Chinese Academy of Sciences, Beijing, China*

<sup>5</sup> *Key Laboratory of Salt Lake Resources and Chemistry, Key Laboratory for Salt Lake Geology and Environment of Qinghai Province, Qinghai Institute of Salt Lakes, Chinese Academy of Sciences, Xining, China*

Corresponding authors: wangsen128@aliyun.com (S.W.); kongx@chem.gu.se (X.K.)

**Table S1.** Molar concentration (mol/l) of all samples.

| No.             | Type    | Na <sup>+</sup> | K <sup>+</sup> | Mg <sup>2+</sup> | Ca <sup>2+</sup> | Cl <sup>-</sup> | SO <sub>4</sub> <sup>2-</sup> | NO <sub>3</sub> <sup>-</sup> | NH <sub>4</sub> <sup>+</sup> | References    |
|-----------------|---------|-----------------|----------------|------------------|------------------|-----------------|-------------------------------|------------------------------|------------------------------|---------------|
| 1 <sup>a</sup>  | Aerosol | 8.70E-12        | -              | 8.33E-13         | 1.00E-11         | 3.94E-11        | 5.00E-11                      | 2.26E-10                     | 3.22E-10                     | From [16]     |
| 2 <sup>a</sup>  |         | 1.30E-11        | 1.03E-11       | 8.33E-12         | 2.50E-11         | 8.45E-12        | 5.63E-11                      | 1.56E-10                     | 2.11E-10                     |               |
| 3 <sup>a</sup>  |         | 8.70E-12        | 1.28E-11       | 3.33E-12         | 1.25E-12         | 8.45E-12        | 5.00E-11                      | 8.39E-11                     | 1.39E-10                     |               |
| 4 <sup>b</sup>  | Brine   | 3.8430          | 0.0826         | 0.0189           | 0.2425           | 4.3913          | 0.1726                        | -                            | -                            | From [42]     |
| 5 <sup>b</sup>  |         | 4.5613          | 0.0890         | 0.5379           | 0.0108           | 5.1048          | 0.3078                        | -                            | -                            |               |
| 6 <sup>b</sup>  |         | 1.1883          | 0.0064         | 0.1742           | 0.0078           | 1.2749          | 0.1364                        | -                            | -                            |               |
| 7 <sup>b</sup>  |         | 3.4883          | 0.1146         | 1.1046           | 0.0030           | 5.2876          | 0.2461                        | -                            | -                            |               |
| 8 <sup>b</sup>  |         | 0.1717          | 0.0038         | 0.0004           | 0.0213           | 0.1687          | 0.0243                        | -                            | -                            |               |
| 9 <sup>b</sup>  |         | 0.4209          | 0.0115         | 0.0575           | 0.0003           | 0.3856          | 0.0645                        | -                            | -                            |               |
| 10 <sup>c</sup> | Brine   | 0.7435          | 0.5077         | 3.1750           | 0.0075           | 7.2592          | 0.0635                        | -                            | -                            | From [43, 44] |
| 11 <sup>c</sup> |         | 1.7217          | 0.5410         | 2.1708           | 0.0125           | 6.2423          | 0.0750                        | -                            | -                            |               |
| 12 <sup>c</sup> |         | 1.6130          | 0.2949         | 2.3292           | 0.0100           | 6.1972          | 0.0979                        | -                            | -                            |               |
| 13 <sup>c</sup> |         | 0.5609          | 0.4179         | 3.0792           | 0.0150           | 7.0592          | 0.0406                        | -                            | -                            |               |
| 14 <sup>c</sup> |         | 1.1391          | 0.2103         | 2.6583           | 0.0200           | 6.5972          | 0.0396                        | -                            | -                            |               |
| 15 <sup>c</sup> |         | 1.4913          | 0.5385         | 2.1542           | 0.0250           | 6.2930          | 0.0385                        | -                            | -                            |               |
| 16 <sup>c</sup> |         | 0.2522          | 0.1846         | 3.7042           | 0.0225           | 7.8282          | 0.0156                        | -                            | -                            |               |
| 17 <sup>c</sup> |         | 0.2478          | 0.1231         | 3.8500           | 0.0375           | 8.0901          | 0.0115                        | -                            | -                            |               |
| 18 <sup>c</sup> |         | 1.8652          | 0.1308         | 1.9292           | 0.0275           | 5.7887          | 0.0510                        | -                            | -                            |               |
| 19 <sup>c</sup> |         | 2.2435          | 0.7718         | 1.5250           | 0.0400           | 6.0535          | 0.0365                        | -                            | -                            |               |
| 20 <sup>c</sup> |         | 1.1652          | 0.2282         | 2.5208           | 0.1200           | 6.6282          | 0.0115                        | -                            | -                            |               |
| 21 <sup>c</sup> |         | 0.6391          | 0.1359         | 2.7958           | 0.3825           | 7.1155          | 0.0021                        | -                            | -                            |               |
| 22 <sup>c</sup> |         | 1.2391          | 0.1308         | 2.2125           | 0.3350           | 6.4507          | 0.0031                        | -                            | -                            |               |
| 23 <sup>c</sup> |         | 2.0217          | 0.0769         | 1.6250           | 0.3025           | 5.9324          | 0.0042                        | -                            | -                            |               |
| 24 <sup>c</sup> |         | 1.9913          | 0.0795         | 1.6542           | 0.3075           | 5.9718          | 0.0042                        | -                            | -                            |               |
| 25 <sup>c</sup> |         | 0.6130          | 0.1795         | 2.9875           | 0.1800           | 7.0958          | 0.0063                        | -                            | -                            |               |
| 26 <sup>c</sup> |         | 1.1522          | 0.1154         | 2.3708           | 0.2675           | 6.5155          | 0.0042                        | -                            | -                            |               |
| 27 <sup>c</sup> |         | 0.7348          | 0.1359         | 2.8000           | 0.2425           | 6.9268          | 0.0031                        | -                            | -                            |               |
| 28 <sup>c</sup> |         | 1.3348          | 0.2667         | 2.2208           | 0.1850           | 6.3803          | 0.0073                        | -                            | -                            |               |
| 29 <sup>c</sup> |         | 1.9522          | 0.0923         | 1.8042           | 0.1925           | 6.0141          | 0.0063                        | -                            | -                            |               |
| 30 <sup>c</sup> |         | 0.4652          | 0.2282         | 3.1208           | 0.2300           | 7.3493          | 0.0031                        | -                            | -                            |               |
| 31 <sup>c</sup> |         | 0.1217          | 0.0359         | 4.0500           | 0.3650           | 8.9183          | 0.0021                        | -                            | -                            |               |
| 32 <sup>c</sup> |         | 0.2348          | 0.0641         | 3.8208           | 0.0750           | 8.0451          | 0.0083                        | -                            | -                            |               |
| 33 <sup>c</sup> |         | 1.3217          | 0.1333         | 2.1750           | 0.2850           | 6.3437          | 0.0031                        | -                            | -                            |               |
| 34 <sup>c</sup> |         | 3.1043          | 0.0718         | 1.0750           | 0.1700           | 5.6366          | 0.0094                        | -                            | -                            |               |
| 35 <sup>c</sup> |         | 3.5174          | 0.0410         | 0.8792           | 0.1550           | 5.5972          | 0.0104                        | -                            | -                            |               |
| 36 <sup>c</sup> |         | 2.1261          | 0.1179         | 1.7750           | 0.2050           | 6.0394          | 0.0083                        | -                            | -                            |               |
| 37 <sup>c</sup> |         | 1.0174          | 0.0154         | 1.5000           | 0.1350           | 4.1549          | 0.0167                        | -                            | -                            |               |
| 38 <sup>c</sup> |         | 1.1391          | 0.5462         | 2.5167           | 0.0950           | 6.7042          | 0.0146                        | -                            | -                            |               |
| 39 <sup>c</sup> |         | 3.5000          | 0.0410         | 0.8833           | 0.1525           | 5.5831          | 0.0104                        | -                            | -                            |               |
| 40 <sup>c</sup> |         | 3.6696          | 0.0462         | 0.7750           | 0.1700           | 5.5831          | 0.0094                        | -                            | -                            |               |
| 41 <sup>c</sup> |         | 3.6130          | 0.0487         | 0.7083           | 0.2650           | 5.5859          | 0.0063                        | -                            | -                            |               |
| 42 <sup>c</sup> |         | 3.8957          | 0.0385         | 0.6292           | 0.2050           | 5.5831          | 0.0073                        | -                            | -                            |               |
| 43 <sup>c</sup> |         | 3.1739          | 0.0333         | 0.9167           | 0.3650           | 5.7352          | 0.0083                        | -                            | -                            |               |
| 44 <sup>c</sup> |         | 0.0522          | 0.0179         | 4.3875           | 0.6475           | 10.0986         | 0.0021                        | -                            | -                            |               |

|                 |         |          |          |          |          |          |          |   |   |           |
|-----------------|---------|----------|----------|----------|----------|----------|----------|---|---|-----------|
| 45 <sup>c</sup> |         | 1.5522   | 0.1000   | 1.7292   | 0.5725   | 6.2254   | 0.0042   | - | - |           |
| 46 <sup>d</sup> |         | 3.4261   | 0.0756   | 0.8063   | 0.0450   | 4.5262   | 0.3360   | - | - |           |
| 47 <sup>d</sup> |         | 3.8783   | 0.0705   | 0.8667   | 0.0263   | 5.1276   | 0.3719   | - | - |           |
| 48 <sup>d</sup> |         | 3.7522   | 0.0769   | 1.0438   | 0.0213   | 5.1206   | 0.5094   | - | - |           |
| 49 <sup>d</sup> |         | 3.5543   | 0.0846   | 1.1375   | 0.0188   | 5.4217   | 0.5278   | - | - |           |
| 50 <sup>d</sup> |         | 2.4174   | 0.1692   | 2.2938   | 0.0213   | 5.5780   | 1.0552   | - | - |           |
| 51 <sup>d</sup> |         | 1.0022   | 0.2731   | 2.8396   | 0.0363   | 5.8113   | 0.8011   | - | - |           |
| 52 <sup>d</sup> |         | 0.2217   | 0.1872   | 3.8313   | 0.0000   | 6.5392   | 0.4346   | - | - |           |
| 53 <sup>d</sup> |         | 0.0783   | 0.0269   | 4.7667   | 0.0000   | 8.1668   | 0.3945   | - | - |           |
| 54 <sup>d</sup> |         | 0.0500   | 0.0167   | 4.9188   | 0.0600   | 8.6287   | 0.2740   | - | - |           |
| 55 <sup>d</sup> | Brine   | 0.0457   | 0.0128   | 4.8771   | 0.0613   | 8.7611   | 0.2922   | - | - | From [45] |
| 56 <sup>d</sup> |         | 0.0478   | 0.0141   | 4.6500   | 0.0563   | 8.3594   | 0.2646   | - | - |           |
| 57 <sup>d</sup> |         | 2.9257   | 0.1677   | 1.7238   | 0.0043   | 5.2473   | 0.4856   | - | - |           |
| 58 <sup>d</sup> |         | 2.4122   | 0.1805   | 2.2342   | 0.0035   | 5.4304   | 0.5092   | - | - |           |
| 59 <sup>e</sup> |         | 1.8048   | 0.1964   | 2.5263   | 0.0033   | 5.6955   | 0.5492   | - | - |           |
| 60 <sup>d</sup> |         | 1.6778   | 0.2056   | 2.6396   | 0.0030   | 5.8679   | 0.5202   | - | - |           |
| 61 <sup>d</sup> |         | 0.8652   | 0.2379   | 3.2013   | 0.0028   | 6.0685   | 0.4972   | - | - |           |
| 62 <sup>d</sup> |         | 1.2065   | 0.2541   | 3.1154   | 0.0028   | 6.3530   | 0.4568   | - | - |           |
| 63 <sup>d</sup> |         | 0.3083   | 0.0495   | 4.7129   | 0.0010   | 8.6800   | 0.3291   | - | - |           |
| 64 <sup>d</sup> |         | 0.8087   | 0.0585   | 3.7167   | 0.0018   | 7.5406   | 0.3520   | - | - |           |
| 65 <sup>d</sup> |         | 0.2022   | 0.0215   | 4.7233   | 0.0008   | 9.2707   | 0.3006   | - | - |           |
| 66 <sup>e</sup> | Brine   | 3.4804   | 0.1185   | 1.1413   | 0.0058   | 5.2823   | 0.2441   | - | - | From [46] |
| 67 <sup>e</sup> |         | 3.4591   | 0.1172   | 1.1396   | 0.0043   | 5.2490   | 0.2373   | - | - |           |
| 68 <sup>e</sup> |         | 2.7022   | 0.1133   | 1.0504   | 0.0028   | 4.6515   | 0.1920   | - | - |           |
| 69 <sup>e</sup> |         | 0.8761   | 0.0315   | 0.4508   | 0.0020   | 1.5321   | 0.1495   | - | - |           |
| 70 <sup>f</sup> | Aerosol | 1.01E-04 | 1.79E-06 | 4.58E-06 | 5.43E-05 | 8.45E-05 | 6.36E-05 | - | - | From [47] |
| 71 <sup>f</sup> |         | 2.09E-05 | 1.03E-06 | 8.33E-07 | 5.50E-06 | 1.58E-05 | 7.19E-06 | - | - |           |
| 72 <sup>f</sup> |         | 2.87E-05 | 7.69E-07 | 8.33E-07 | 4.75E-06 | 2.39E-05 | 6.56E-06 | - | - |           |
| 73 <sup>f</sup> |         | 3.39E-05 | 1.03E-06 | 1.25E-06 | 3.75E-06 | 2.39E-05 | 7.50E-06 | - | - |           |
| 74 <sup>f</sup> |         | 3.17E-05 | 1.28E-06 | 8.33E-07 | 7.00E-06 | 1.55E-05 | 1.40E-05 | - | - |           |
| 75 <sup>f</sup> |         | 2.17E-05 | 3.59E-06 | 8.33E-07 | 3.75E-06 | 1.89E-05 | 5.83E-06 | - | - |           |
| 76 <sup>f</sup> |         | 1.07E-04 | 3.59E-06 | 2.50E-06 | 2.50E-05 | 8.25E-05 | 3.98E-05 | - | - |           |
| 77 <sup>f</sup> |         | 1.02E-04 | 1.54E-06 | 1.67E-06 | 3.53E-05 | 3.75E-05 | 6.70E-05 | - | - |           |
| 78 <sup>f</sup> |         | 1.28E-04 | 2.31E-06 | 5.42E-06 | 4.20E-05 | 6.68E-05 | 7.61E-05 | - | - |           |
| 79 <sup>f</sup> |         | 5.39E-05 | 2.05E-06 | 1.25E-06 | 8.25E-06 | 1.21E-05 | 2.83E-05 | - | - |           |
| 80 <sup>f</sup> |         | 3.26E-05 | 2.05E-06 | 2.92E-06 | 2.78E-05 | 2.59E-05 | 3.31E-05 | - | - |           |
| 81 <sup>f</sup> |         | 8.70E-06 | 7.69E-07 | 1.25E-06 | 5.75E-06 | 5.92E-06 | 6.77E-06 | - | - |           |
| 82 <sup>f</sup> |         | 1.74E-06 | 5.13E-07 | 8.33E-07 | 3.25E-06 | 1.13E-06 | 2.60E-06 | - | - |           |
| 83 <sup>f</sup> |         | 6.52E-06 | 7.69E-07 | 1.25E-06 | 1.35E-05 | 3.66E-06 | 1.46E-05 | - | - |           |
| 84 <sup>f</sup> |         | 1.09E-05 | 5.13E-07 | 1.25E-06 | 3.50E-06 | 6.20E-06 | 5.73E-06 | - | - |           |
| 85 <sup>f</sup> |         | 2.83E-05 | 7.69E-07 | 2.08E-06 | 5.00E-06 | 2.90E-05 | 5.52E-06 | - | - |           |
| 86 <sup>f</sup> |         | 1.17E-05 | 7.69E-07 | 8.33E-07 | 5.50E-06 | 7.89E-06 | 7.40E-06 | - | - |           |
| 87 <sup>f</sup> |         | 6.96E-06 | 5.13E-07 | 1.25E-06 | 9.75E-06 | 5.07E-06 | 1.03E-05 | - | - |           |
| 88 <sup>f</sup> |         | 6.09E-06 | 5.13E-07 | 8.33E-07 | 1.25E-06 | 3.10E-06 | 1.15E-06 | - | - |           |
| 89 <sup>f</sup> |         | -        | 5.13E-07 | 4.17E-07 | 1.00E-06 | 5.63E-07 | -        | - | - |           |
| 90 <sup>g</sup> | Brine   | 0.0058   | 0.0006   | 0.0009   | 0.0009   | 0.0062   | 0.0009   | - | - |           |

|                  |        |        |        |        |         |        |   |   |           |
|------------------|--------|--------|--------|--------|---------|--------|---|---|-----------|
| 91 <sup>g</sup>  | 0.0031 | 0.0000 | 0.0009 | 0.0011 | 0.0026  | 0.0009 | - | - |           |
| 92 <sup>g</sup>  | 0.0074 | 0.0002 | 0.0013 | 0.0009 | 0.0032  | 0.0012 | - | - |           |
| 93 <sup>g</sup>  | 0.0060 | 0.0002 | 0.0017 | 0.0010 | 0.0048  | 0.0010 | - | - |           |
| 94 <sup>g</sup>  | 1.2070 | 0.0070 | 0.1370 | 0.0720 | 1.5800  | 0.0260 | - | - |           |
| 95 <sup>g</sup>  | 1.1670 | 0.0040 | 0.1290 | 0.0810 | 1.5180  | 0.0360 | - | - |           |
| 96 <sup>g</sup>  | 1.1310 | 0.0040 | 0.1310 | 0.0400 | 1.4640  | 0.0070 | - | - |           |
| 97 <sup>g</sup>  | 0.0820 | 0.0006 | 4.5300 | 1.5100 | 12.0200 | 0.0002 | - | - |           |
| 98 <sup>g</sup>  | 0.7820 | 0.2220 | 2.9900 | 0.4950 | 7.9890  | 0.0023 | - | - |           |
| 99 <sup>g</sup>  | 4.0820 | 0.0850 | 0.9810 | 0.1040 | 6.3020  | 0.0182 | - | - |           |
| 100 <sup>g</sup> | 4.5880 | 0.0140 | 0.4570 | 0.2770 | 6.0590  | 0.0063 | - | - |           |
| 101 <sup>g</sup> | 0.8720 | 0.5540 | 3.3870 | 0.0097 | 7.7270  | 0.1150 | - | - |           |
| 102 <sup>g</sup> | 2.1200 | 0.3650 | 1.9100 | 0.0192 | 6.1580  | 0.0870 | - | - | From [47, |
| 103 <sup>g</sup> | 0.0410 | 0.0210 | 5.7550 | 0.0025 | 11.4000 | 0.0806 | - | - | 48]       |
| 104 <sup>g</sup> | 2.0510 | 0.5490 | 2.1560 | 0.0620 | 6.9790  | 0.0273 | - | - |           |
| 105 <sup>g</sup> | 1.2190 | 0.5240 | 3.1310 | 0.0230 | 7.7000  | 0.1760 | - | - |           |
| 106 <sup>g</sup> | 0.2640 | 0.1570 | 4.7310 | 0.0020 | 9.4920  | 0.1970 | - | - |           |
| 107 <sup>g</sup> | 0.8320 | 0.4710 | 3.3920 | 0.0210 | 7.5920  | 0.0550 | - | - |           |
| 108 <sup>g</sup> | 0.8970 | 0.4860 | 3.2370 | 0.0210 | 7.5940  | 0.0510 | - | - |           |
| 109 <sup>g</sup> | 0.8830 | 0.4620 | 3.2570 | 0.0220 | 7.4710  | 0.0600 | - | - |           |
| 110 <sup>g</sup> | 4.6280 | 0.2090 | 0.5650 | 0.0077 | 6.0060  | 0.2650 | - | - |           |
| 111 <sup>g</sup> | 4.0620 | 0.2470 | 1.4520 | 0.0288 | 5.7030  | 0.7490 | - | - |           |
| 112 <sup>g</sup> | 0.5440 | 0.5530 | 3.8340 | 0.0024 | 8.4490  | 0.1470 | - | - |           |
| 113 <sup>g</sup> | 0.2880 | 0.2110 | 4.6320 | 0.0000 | 8.8010  | 0.4690 | - | - |           |

---

**Table S2.** DRH predicted by the AIOMFAC model.

| Site                 | Type    | No.  | NaCl  | MgCl <sub>2</sub> | MgSO <sub>4</sub> | KCl   | NH <sub>4</sub> NO <sub>3</sub> | (NH <sub>4</sub> ) <sub>2</sub> SO <sub>4</sub> |
|----------------------|---------|------|-------|-------------------|-------------------|-------|---------------------------------|-------------------------------------------------|
| Xiao Chi             | Brine   | XC   | 69.17 | 7.8               | 73.36             | 7.8   | -                               | -                                               |
| Yan Chi              |         | YC   | 66.47 | 25.75             | 81.75             | 32.57 | -                               | -                                               |
| Chaka                |         | CK   | 70.38 | 30.7              | 66                | 44.71 | -                               | -                                               |
| KeKe                 |         | KK   | 71.83 | 26.16             | 71.83             | 36.17 | -                               | -                                               |
| Qarhan               |         | QH   | 42.42 | 37.52             | 66.09             | 44.71 | -                               | -                                               |
| Mang'ai              |         | MA   | 63.45 | 32.95             | 77.32             | 51.1  | -                               | -                                               |
| pre-dust event       | Aerosol | 1a   | -     | -                 | 71.03             | -     | 34.03                           | 77.1                                            |
| dust event           |         | 2a   | 0.09  | -                 | 84.32             | 0.09  | 39.27                           | 82.65                                           |
| post-dust event      |         | 3a   | -     | -                 | 71.36             | -     | 23.85                           | 69.86                                           |
| Lake Dachaidan       | Brine   | 4b   | 72.11 | 10.39             | 68.42             | 35.88 | -                               | -                                               |
| Lake Xiaochaidan     |         | 5b   | 72.86 | 27.19             | 58.84             | 36.52 | -                               | -                                               |
| Lake Gahai-1         |         | 6b   | 72    | 23.68             | 67.91             | 2.8   | -                               | -                                               |
| Lake Chaka           |         | 7b   | 71.76 | 30.11             | 62.87             | 44.1  | -                               | -                                               |
| Lake Qinghai         |         | 8b   | 66.34 | 0.33              | 73.88             | 25.79 | -                               | -                                               |
| Lake Gahai           |         | 9b   | 72.62 | 25.49             | 65.94             | 41.79 | -                               | -                                               |
| Bieletan             | Brine   | 10c  | 55.08 | 35.41             | 58.36             | 61.31 | -                               | -                                               |
| Dabuxun              |         | 18c  | 66.95 | 33.63             | 59.12             | 48.3  | -                               | -                                               |
| Qarhan               |         | 30c  | 50.58 | 37.08             | 57.61             | 54.27 | -                               | -                                               |
| Huobuxun             |         | 37c  | 63.93 | 35.24             | 68.48             | 26.81 | -                               | -                                               |
| Gasikule Salt Lake-1 | Brine   | 51d  | 56.67 | 32.26             | 82.02             | 52.76 | -                               | -                                               |
| Gasikule Salt Lake-2 |         | 62d  | 58.31 | 33.48             | 76.06             | 54.79 | -                               | -                                               |
| KeKe                 | Brine   | 67e  | 71.67 | 29.88             | 62.74             | 43.89 | -                               | -                                               |
| Inner Mongolia-1     | Aerosol | 74f  | 45.08 | 0.02              | 82.69             | 23.21 | -                               | -                                               |
| Inner Mongolia-2     |         | 84f  | 45.16 | 0.34              | 89.29             | 24.22 | -                               | -                                               |
| Qaidam River         | Brine   | 91g  | 51.64 | 3.63              | 91.17             | 15.27 | -                               | -                                               |
| Golmud River         |         | 92g  | 56.54 | 1.85              | 86.5              | 25.47 | -                               | -                                               |
| Karst Spring         |         | 94g  | 72.12 | 24.48             | 73.7              | 21.26 | -                               | -                                               |
| North Huobusun       |         | 99g  | 71.86 | 30.83             | 54.51             | 39.21 | -                               | -                                               |
| Dabusun              |         | 109g | 55.02 | 35.33             | 58.31             | 61.27 | -                               | -                                               |
| Senie                |         | 110g | 72.43 | 26.71             | 58.3              | 48.76 | -                               | -                                               |
| Dabiele              |         | 111g | 70.26 | 26.19             | 74.02             | 49.43 | -                               | -                                               |
| Xiaobiele            |         | 112g | 47.64 | 35.68             | 64.21             | 61.56 | -                               | -                                               |
| Tuanjie              |         | 113g | 42.18 | 37.09             | 75.04             | 48.99 | -                               | -                                               |

**Table S3.** Correlations of the DRH and ions in brine samples.

|                   | <b>Na<sup>+</sup></b> | <b>K<sup>+</sup></b> | <b>Mg<sup>2+</sup></b> | <b>Ca<sup>2+</sup></b> | <b>Cl<sup>-</sup></b> | <b>SO<sub>4</sub><sup>2-</sup></b> |
|-------------------|-----------------------|----------------------|------------------------|------------------------|-----------------------|------------------------------------|
| NaCl              | 0.65                  | -0.48                | -0.76                  | 0.00                   | -0.44                 | 0.07                               |
| MgCl <sub>2</sub> | 0.13                  | 0.56                 | 0.74                   | 0.04                   | 0.81                  | 0.26                               |
| MgSO <sub>4</sub> | -0.42                 | -0.35                | -0.21                  | -0.23                  | -0.52                 | 0.28                               |
| KCl               | 0.15                  | 0.81                 | 0.74                   | 0.02                   | 0.81                  | 0.30                               |

**Table S4.** Correlations of the DRH value of four kinds of salts in brine samples.

|                   | NaCl  | MgCl <sub>2</sub> | MgSO <sub>4</sub> | KCl  |
|-------------------|-------|-------------------|-------------------|------|
| NaCl              | 1.00  |                   |                   |      |
| MgCl <sub>2</sub> | -0.25 | 1.00              |                   |      |
| MgSO <sub>4</sub> | -0.20 | -0.53             | 1.00              |      |
| KCl               | -0.36 | 0.69              | -0.41             | 1.00 |

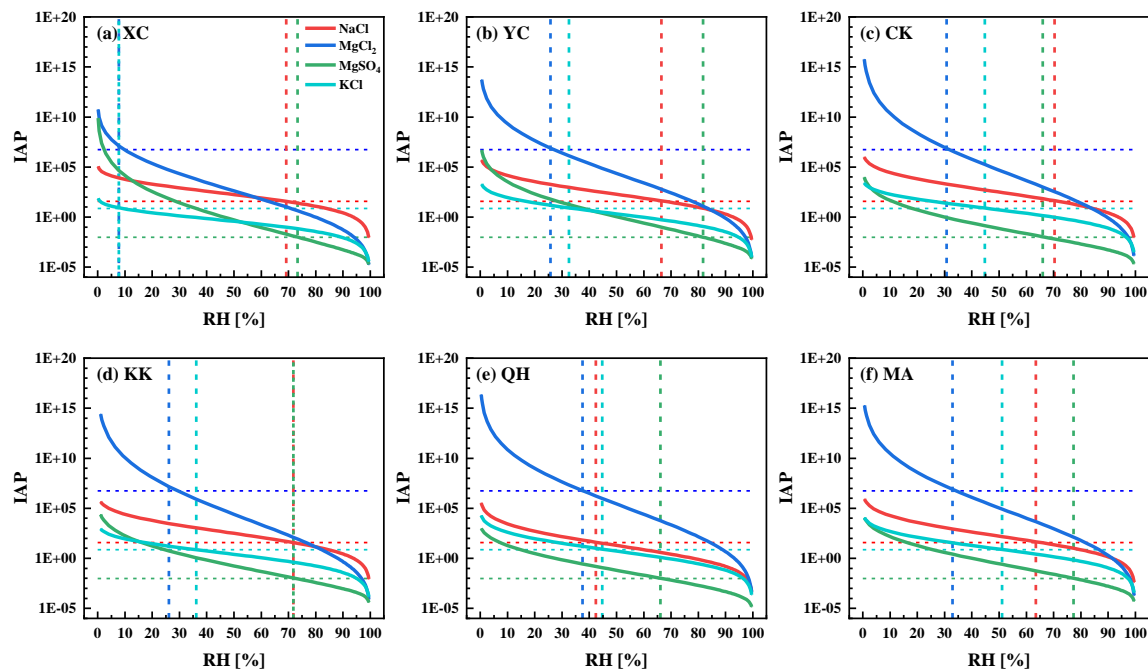

**Figure S1a.** AIOMFAC modelled IAPs as a function of RH (brine samples from Shan'xi and Qinghai). The horizontal dashed lines are DRH for individual salts in the corresponding salt mixture. The vertical dashed lines are the DRH found by the AIOMFAC model.



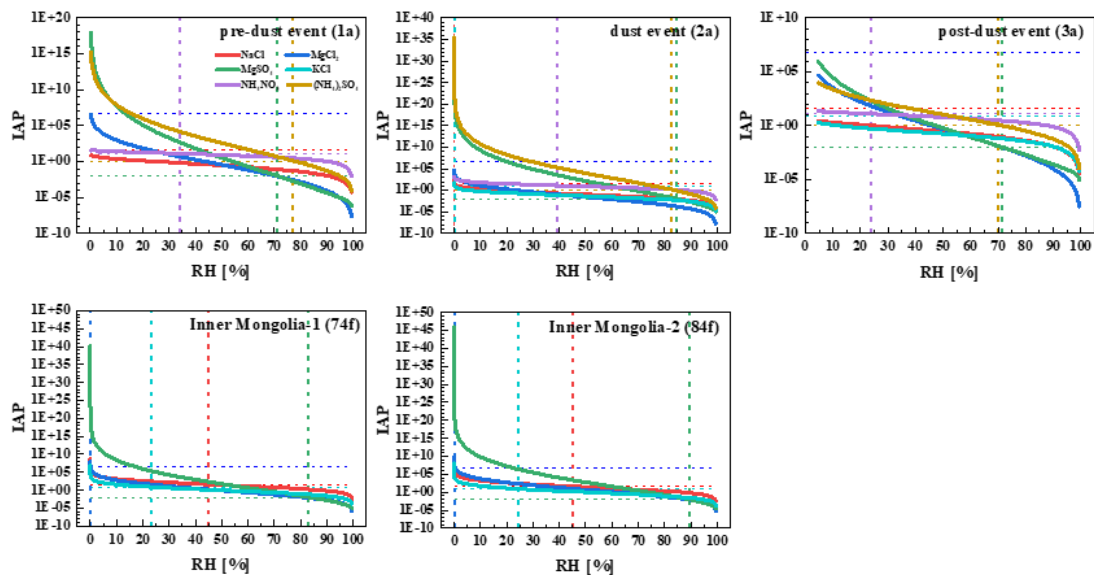

**Figure S1b.** AIOMFAC modelled IAP as a function of RH (aerosol samples). The horizontal dashed lines are DRH for individual salts in the corresponding salt mixture. The vertical dashed lines are the DRH found by the AIOMFAC model.

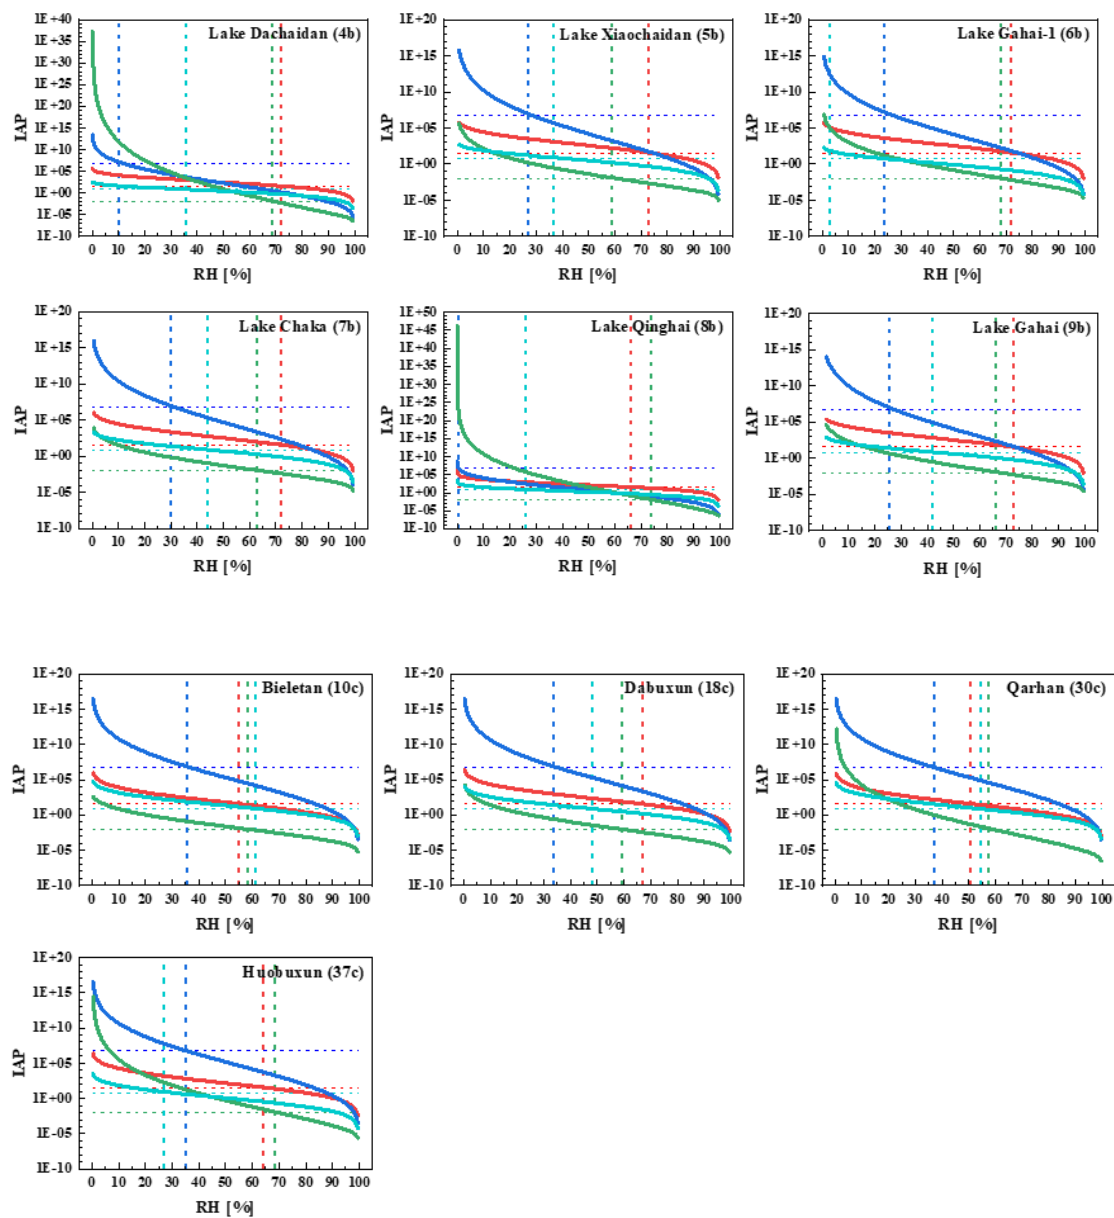

**Figure S1c.** AIOMFAC modelled IAP as a function of RH (brine samples). The horizontal dashed lines are DRH for individual salts in the corresponding salt mixture. The vertical dashed lines are the DRH found by the AIOMFAC model.

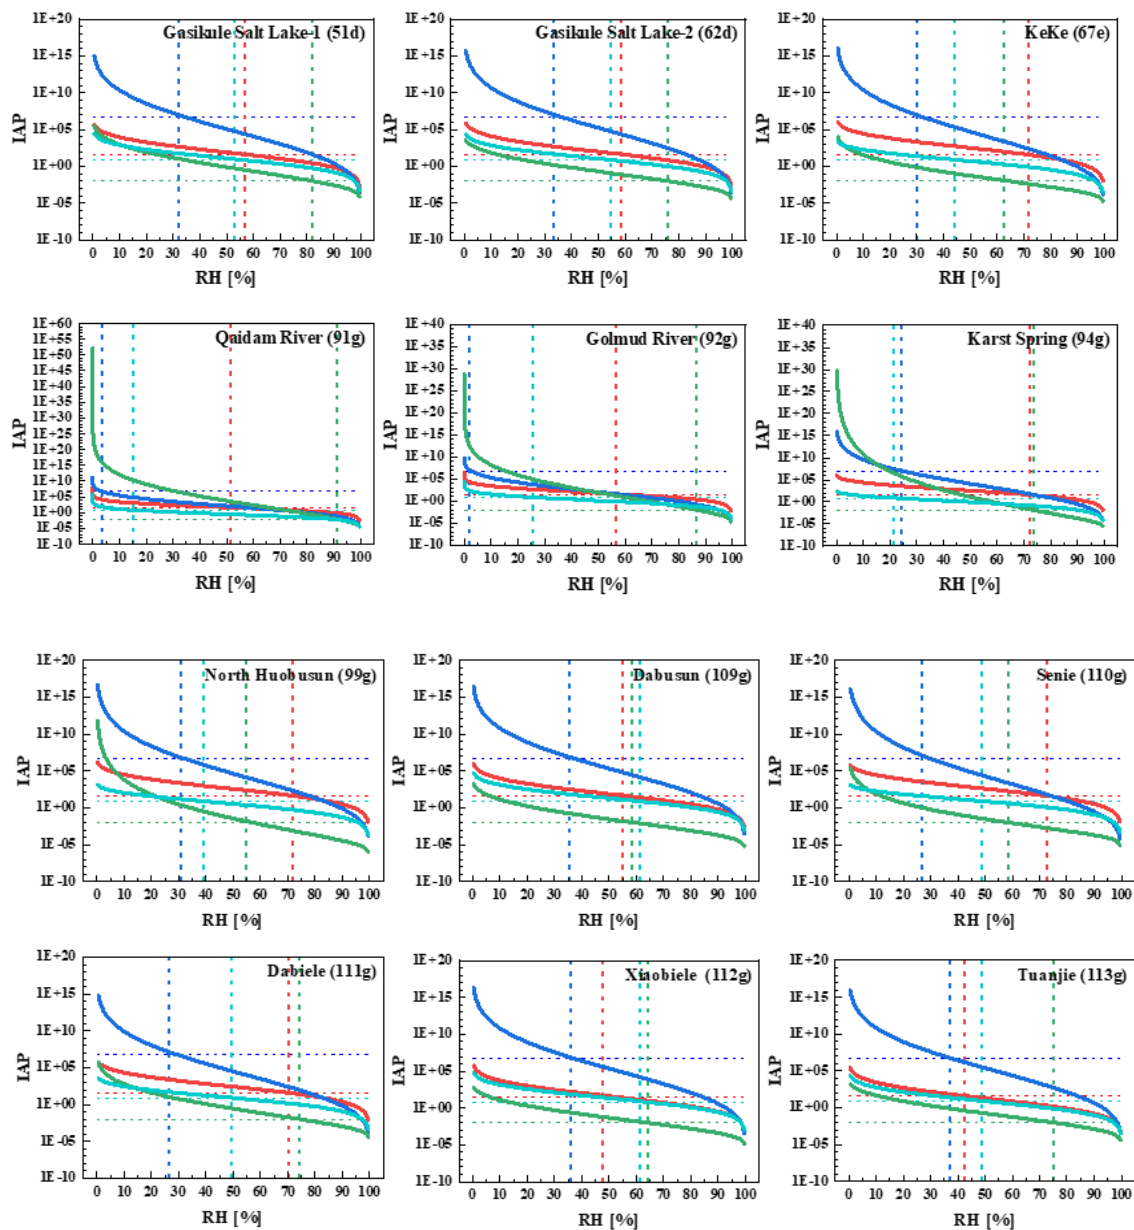

**Figure S1d.** AIOMFAC modelled IAP as a function of RH (brine samples). The horizontal dashed lines are DRH for individual salts in the corresponding salt mixture. The vertical dashed lines are the DRH found by the AIOMFAC model.
